# Supplementary material
Source: PubMed Central journal article supplement (PMC3243489)
Supplement: NIHMS324514-supplement-Suppl_Fig1.pdf [file NIHMS324514-supplement-Suppl_Fig1.pdf]

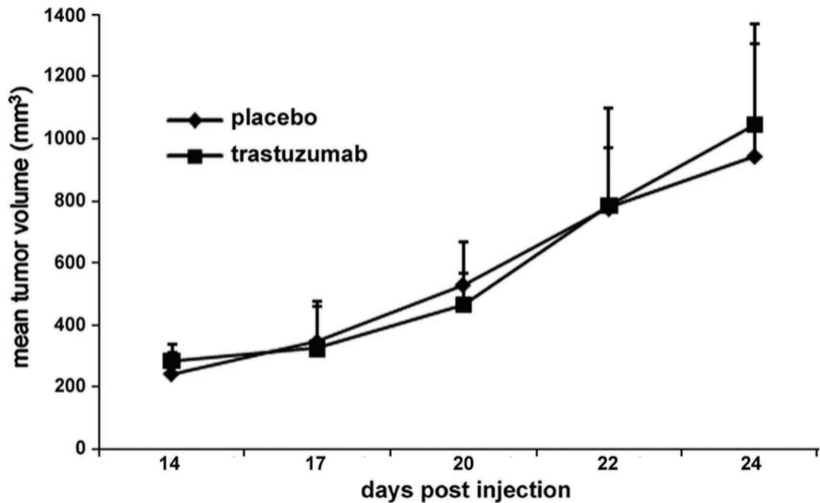

**Supplementary Figure S1.** Trastuzumab resistance of MEFs 611-CTF xenografts. Established xenografts (6 mice/group) derived from MEFs expressing 611-CTF were randomized to receive either placebo or treatment with trastuzumab 10 mg/Kg twice weekly. Treatment was discontinued after day 24 post injection.
